# Supplementary material for: A balanced iterative random forest for gene selection from microarray data
Source: PubMed Central journal article supplement (PMC3766035; doi:10.1186/1471-2105-14-261), 2013-08-27
Supplement: 1471-2105-14-261-S1.pdf [file 1471-2105-14-261-S1.pdf]

|             |         |                                                             |
|-------------|---------|-------------------------------------------------------------|
| 210249_s_at | NCOA1   | Nuclear receptor coactivator 1                              |
| 217728_at   | S100A6  | S100 calcium binding protein A6                             |
| 207426_s_at | TNFSF4  | Tumor necrosis factor superfamily, member 4                 |
| 213056_at   | FRMD4B  | FERM domain containing 4B                                   |
| 206995_x_at | SCARF1  | Scavenger receptor class F, member 1                        |
| 209995_s_at | TCL1A   | T-cell leukemia/lymphoma 1A                                 |
| 209808_x_at | ING1    | Inhibitor of growth family, member 1                        |
| 200660_at   | S100A11 | S100 calcium binding protein                                |
| 208438_s_at | FGR     | Gardner-Rasheed feline sarcoma viral oncogene               |
| 222146_s_at | TCF4    | Transcription factor 4                                      |
| 217939_s_at | AFTPH   | Aftiphilin                                                  |
| 218281_at   | MRPL48  | Mitochondrial ribosomal protein                             |
| 39318_at    | TCL1A   | T-cell leukemia/lymphoma 1A                                 |
| 212587_s_at | PTPRC   | Protein tyrosine phosphatase, receptor type, C              |
| 207416_s_at | NFATC3  | Nuclear factor of activated T-cells calcineurin-dependent 3 |
| 218847_at   | IGF2BP2 | Insulin-like growth factor 2                                |
| 209107_x_at | NCOA1   | Nuclear receptor coactivator 1                              |
| 212386_at   | TCF4    | Transcription factor 4                                      |
| 212588_at   | PTPRC   | Protein tyrosine phosphatase, receptor type, C              |
| 210555_s_at | NFATC3  | Nuclear factor of activated T-cells calcineurin-dependent 3 |
| 217542_at   | MGC5370 | Hypothetical protein MGC5370                                |
| 201461_s_at | MGC5370 | Hypothetical protein MGC5370                                |
| 203753_at   | TCF4    | Transcription factor 4                                      |
| 203434_s_at | MME     | Membrane metallo-endopeptidase                              |
| 213891_s_at | TCF4    | Transcription factor 4                                      |
| 208720_s_at | RBM39   | RNA binding motif protein 39                                |
| 203435_s_at | MME     | Membrane metallo-endopeptidase                              |
| 217979_at   | TSPAN13 | Tetraspanin 13                                              |
| 208894_at   | HLADRA  | Major histocompatibility complex, class II, DR alpha        |
| 210982_s_at | HLADRA  | Major histocompatibility complex, class II, DR alpha        |
| 204689_at   | HHEX    | Hematopoietically expressed homeobox                        |
| 207805_s_at | PSMD9   | Proteasome 26S subunit                                      |
| 209644_x_at | CDKN2A  | Cyclin-dependent kinase inhibitor 2A                        |
| 221569_at   | AHI1    | Abelson helper integration site 1                           |
| 220068_at   | VPREB3  | Pre-B lymphocyte gene 3                                     |
| 200026_at   | RPL34   | Ribosomal protein L34                                       |
| 205548_s_at | BTG3    | BTG family, member 3                                        |

|             |          |                                                                        |
|-------------|----------|------------------------------------------------------------------------|
| 214003_x_at | RPS20    | Ribosomal protein S20                                                  |
| 216307_at   | DGKB     | diacylglycerol kinase, beta 90kDa                                      |
| 219451_at   | MSRB2    | methionine sulfoxide reductase B2                                      |
| 217413_s_at | TNXB     | tenascin XB                                                            |
| 221952_x_at | TRMT5    | tRNA methyltransferase 5 homolog ( <i>S. cerevisiae</i> )              |
| 206287_s_at | ITIH4    | inter-alpha-trypsin inhibitor heavy chain family, member 4             |
| 202236_s_at | SLC16A1  | solute carrier family 16, member 1 (monocarboxylic acid transporter 1) |
| 212423_at   | ZCCHC24  | Zinc finger, CCHC domain containing 24                                 |
| 200032_s_at | RPL9     | Ribosomal protein L9                                                   |
| 202695_s_at | STK17A   | Serine/threonine kinase 17a                                            |
| 205726_at   | DIAPH2   | Diaphanous homolog 2 ( <i>Drosophila</i> )                             |
| 204075_s_at | KIAA0562 | Uncharacterized protein                                                |
| 217820_s_at | ENAH     | Enabled homolog ( <i>Drosophila</i> )                                  |
| 200062_s_at | RPL30    | Ribosomal protein L30                                                  |
| 203577_at   | GTF2H4   | General transcription factor IIH, polypeptide 4                        |
| 204218_at   | C11orf51 | Chromosome 11 open reading frame 51                                    |
| 203233_at   | IL4R     | Interleukin 4 receptor                                                 |
| 203616_at   | POLB     | Polymerase (DNA directed), beta                                        |
| 212810_s_at | SLC1A4   | Solute carrier family 1                                                |
| 209152_s_at | TCF3     | Transcription factor 3                                                 |
| 221543_s_at | ERLIN2   | ER lipid raft associated 2                                             |
| 212324_s_at | VPS13D   | Vacuolar protein sorting 13                                            |
| 201094_at   | RPS29    | Ribosomal protein S29                                                  |
| 208690_s_at | PDLIM1   | PDZ and LIM domain 1                                                   |
| 206752_s_at | DFFB     | DNA fragmentation factor                                               |
| 215000_s_at | FEZ2     | Fasciculation and elongation protein zeta 2                            |
| 203688_at   | PKD2     | Polycystic kidney disease 2                                            |
| 205786_s_at | ITGAM    | Integrin, alpha M                                                      |
| 217168_s_at | HERPUD1  | Homocysteine and ER stress-inducible, ubiquitin-like domain member 1   |
| 203414_at   | MMD      | Monocyte to macrophage differentiation                                 |
| 218380_at   | NLRP1    | NLR family, pyrin domain containing 1                                  |
| 211991_s_at | HLADPA1  | Major histocompatibility complex                                       |
| 210776_x_at | EST63624 | Jurkat T-cells V Homo sapiens cDNA 5'- end, mRNA sequence              |
| 200602_at   | APP      | Amyloid beta (A4) precursor protein                                    |
